# Supplementary material for: Effect of yeast species and processing on intestinal microbiota of Atlantic salmon (Salmo salar) fed soybean meal-based diets in seawater
Source: Anim Microbiome. 2023 Apr 4;5:21. doi: 10.1186/s42523-023-00242-y (PMC10074822; doi:10.1186/s42523-023-00242-y)
Supplement: Supplementary file 2 — Additional file 2. Table S2. The dominant taxa identified as contaminants in the negative controls and the blank filter papers. Table S3. The prevalence of core ASVs in the digesta of fish fed the experimental diets. [file 42523_2023_242_MOESM2_ESM.xlsx]

## Sheet: Table S2
Table S2. The dominant taxa identified as contaminants in the negative controls and the blank filter papers
Row Labels	Sum of Abundance		Row Labels	Sum of Abundance	Abundance
p_Actinobacteriota|c_Actinobacteria|o_Actinomycetales|f_Actinomycetaceae|g_Actinomyces|s_	0.252971		Actinobacteria	0.661006	0.468196
p_Actinobacteriota|c_Actinobacteria|o_Micrococcales|f_Micrococcaceae|g_Micrococcus|s_	0.118423		Bacilli	0.249764	0.17691
p_Proteobacteria|c_Alphaproteobacteria|o_Rhodobacterales|f_Rhodobacteraceae|g_Paracoccus|s_	0.0753093		Gammaproteobacteria	0.208669	0.147802
p_Proteobacteria|c_Gammaproteobacteria|o_Pseudomonadales|f_Halomonadaceae|g_Halomonas|s_	0.0731939		Parcubacteria	0.117238	0.0830404
p_Actinobacteriota|c_Actinobacteria|o_Propionibacteriales|f_Propionibacteriaceae|g_Cutibacterium|s_	0.0676939		Alphaproteobacteria	0.0781003	0.0553191
p_Firmicutes|c_Bacilli|o_Bacillales|f_Bacillaceae|g_Oceanobacillus|s_caeni	0.0624012		Clostridia	0.0613824	0.0434776
p_Patescibacteria|c_Parcubacteria|o_|f_|g_|s_	0.0616264		Verrucomicrobiae	0.0133914	0.0094852
p_Firmicutes|c_Clostridia|o_Lachnospirales|f_Lachnospiraceae|g_|s_	0.0556674		Bacteroidia	0.0110137	0.00780111
p_Firmicutes|c_Bacilli|o_Bacillales|f_Bacillaceae|g_Anaerobacillus|s_	0.0504809		Chlamydiae	0.00617829	0.00437613
p_Actinobacteriota|c_Actinobacteria|o_Micrococcales|f_Beutenbergiaceae|g_Salana|s_	0.0479412		Saccharimonadia	0.00462248	0.00327413
p_Actinobacteriota|c_Actinobacteria|o_Micrococcales|f_Micrococcaceae|g_Citricoccus|s_	0.0452396		Gracilibacteria	0.000451149	0.000319552
p_Patescibacteria|c_Parcubacteria|o_Candidatus Nomurabacteria|f_|g_|s_	0.0437109
p_Firmicutes|c_Bacilli|o_Erysipelotrichales|f_Erysipelotrichaceae|g_Erysipelothrix|s_	0.0429701		Grand Total	1.41182	1
p_Proteobacteria|c_Gammaproteobacteria|o_Pseudomonadales|f_Moraxellaceae|g_Enhydrobacter|s_aerosaccus	0.0372028
p_Actinobacteriota|c_Actinobacteria|o_Micrococcales|f_Brevibacteriaceae|g_Brevibacterium|s_ravenspurgense	0.0313722
p_Firmicutes|c_Bacilli|o_Lactobacillales|f_Streptococcaceae|g_Lactococcus|s_	0.0298582
p_Proteobacteria|c_Gammaproteobacteria|o_Burkholderiales|f_Comamonadaceae|g_Acidovorax|s_	0.0252101
p_Proteobacteria|c_Gammaproteobacteria|o_Pseudomonadales|f_Moraxellaceae|g_Enhydrobacter|s_	0.0226019
p_Firmicutes|c_Bacilli|o_Bacillales|f_Bacillaceae|g_Pseudogracilibacillus|s_	0.0181117
p_Actinobacteriota|c_Actinobacteria|o_Corynebacteriales|f_Corynebacteriaceae|g_Lawsonella|s_	0.0161015		Actinobacteria	0.468196	46.8196
p_Actinobacteriota|c_Actinobacteria|o_Micrococcales|f_Brevibacteriaceae|g_Brevibacterium|s_senegalense	0.0150672		Bacilli	0.17691	17.691
p_Proteobacteria|c_Gammaproteobacteria|o_Xanthomonadales|f_Xanthomonadaceae|g_Stenotrophomonas|s_	0.0144737		Gammaproteobacteria	0.147802	14.7802
p_Actinobacteriota|c_Actinobacteria|o_Micrococcales|f_Dermabacteraceae|g_Brachybacterium|s_muris	0.0132351		Parcubacteria	0.0830404	8.30404
p_Actinobacteriota|c_Actinobacteria|o_Micrococcales|f_Micrococcaceae|g_Pseudoglutamicibacter|s_	0.0129168		Alphaproteobacteria	0.0553191	5.53191
p_Firmicutes|c_Bacilli|o_Lactobacillales|f_Aerococcaceae|g_Globicatella|s_	0.0106372		Clostridia	0.0434776	4.34776
p_Bacteroidota|c_Bacteroidia|o_Sphingobacteriales|f_Sphingobacteriaceae|g_Pedobacter|s_	0.010337		Verrucomicrobiae	0.0094852	0.94852
p_Actinobacteriota|c_Actinobacteria|o_Corynebacteriales|f_Corynebacteriaceae|g_Corynebacterium|s_	0.00961506		Bacteroidia	0.00780111	0.780111
p_Proteobacteria|c_Gammaproteobacteria|o_Pseudomonadales|f_Halomonadaceae|g_Halomonas|s_nitritophilus	0.00879836		Chlamydiae	0.00437613	0.437613
p_Actinobacteriota|c_Actinobacteria|o_Corynebacteriales|f_Corynebacteriaceae|g_Corynebacterium|s_urealyticum	0.00859449		Saccharimonadia	0.00327413	0.327413
p_Proteobacteria|c_Gammaproteobacteria|o_Enterobacterales|f_Morganellaceae|g_Providencia|s_	0.00850611		Gracilibacteria	0.000319552	0.0319552
p_Patescibacteria|c_Parcubacteria|o_Candidatus Adlerbacteria|f_|g_|s_	0.00794221
p_Firmicutes|c_Bacilli|o_Lactobacillales|f_Carnobacteriaceae|g_Atopostipes|s_suicloacalis	0.0079191				100
p_Firmicutes|c_Bacilli|o_Bacillales|f_Planococcaceae|g_|s_	0.00767094		Actinobacteria	46.8196
p_Firmicutes|c_Bacilli|o_Bacillales|f_Planococcaceae|g_Chungangia|s_	0.00756782		Bacilli	17.691
p_Verrucomicrobiota|c_Verrucomicrobiae|o_Verrucomicrobiales|f_Rubritaleaceae|g_Luteolibacter|s_	0.00722901		Gammaproteobacteria	14.7802
p_Actinobacteriota|c_Actinobacteria|o_Corynebacteriales|f_Corynebacteriaceae|g_Corynebacterium|s_lipophiloflavum	0.00721909		Parcubacteria	8.30404
p_Actinobacteriota|c_Actinobacteria|o_Corynebacteriales|f_Dietziaceae|g_Dietzia|s_	0.00652509		Alphaproteobacteria	5.53191
p_Proteobacteria|c_Gammaproteobacteria|o_Burkholderiales|f_Comamonadaceae|g_Tepidimonas|s_	0.00635639		Clostridia	4.34776
p_Verrucomicrobiota|c_Verrucomicrobiae|o_Verrucomicrobiales|f_Verrucomicrobiaceae|g_Prosthecobacter|s_	0.00616235		Verrucomicrobiae	0.94852
p_Firmicutes|c_Bacilli|o_Bacillales|f_Planococcaceae|g_Lysinibacillus|s_sphaericus	0.00598086		Bacteroidia	0.780111
p_Firmicutes|c_Clostridia|o_Peptostreptococcales-Tissierellales|f_Family XI|g_Anaerococcus|s_	0.00571505		Chlamydiae	0.437613
p_Proteobacteria|c_Gammaproteobacteria|o_Burkholderiales|f_Comamonadaceae|g_Paucibacter|s_	0.00508434		Saccharimonadia	0.327413
p_Patescibacteria|c_Saccharimonadia|o_Saccharimonadales|f_|g_|s_	0.00462248		Gracilibacteria	0.0319552
p_Firmicutes|c_Bacilli|o_Bacillales|f_Bacillaceae|g_Oceanobacillus|s_indicireducens	0.00446017
p_Proteobacteria|c_Gammaproteobacteria|o_Burkholderiales|f_Comamonadaceae|g_Pelomonas|s_saccharophila	0.00445007
p_Verrucomicrobiota|c_Chlamydiae|o_Chlamydiales|f_Simkaniaceae|g_|s_	0.00318596
p_Patescibacteria|c_Parcubacteria|o_Candidatus Kaiserbacteria|f_|g_|s_	0.00316485
p_Verrucomicrobiota|c_Chlamydiae|o_Chlamydiales|f_Chlamydiaceae|g_|s_	0.00299232
p_Actinobacteriota|c_Actinobacteria|o_Micrococcales|f_Dermabacteraceae|g_Brachybacterium|s_	0.00280214
p_Proteobacteria|c_Alphaproteobacteria|o_Rickettsiales|f_SM2D12|g_|s_	0.00279107
p_Proteobacteria|c_Gammaproteobacteria|o_Burkholderiales|f_Comamonadaceae|g_Rhizobacter|s_	0.00279107
p_Actinobacteriota|c_Actinobacteria|o_Corynebacteriales|f_Corynebacteriaceae|g_Corynebacterium|s_stationis	0.00276329
p_Actinobacteriota|c_Actinobacteria|o_Micrococcales|f_Microbacteriaceae|g_Rhodoluna|s_limnophila	0.00252525
p_Firmicutes|c_Bacilli|o_Bacillales|f_Bacillaceae|g_Oceanobacillus|s_	0.00170565
p_Patescibacteria|c_Parcubacteria|o_Candidatus Yonathbacteria|f_|g_|s_	0.000793546
p_Bacteroidota|c_Bacteroidia|o_Chitinophagales|f_Chitinophagaceae|g_Parasediminibacterium|s_	0.000676724
p_Patescibacteria|c_Gracilibacteria|o_|f_|g_|s_	0.000451149

## Sheet: Table S3
Table S3. The prevalence of core ASVs in the digesta of fish fed the experimental diets
Taxa	FM	ICJ	ACJ	IWA	AWA	SBM
p_Firmicutes|c_Clostridia|o_Peptostreptococcales-Tissierellales|f_Peptostreptococcaceae|g_|s_	100%	100%	100%	100%	100%	100%
p_Firmicutes|c_Bacilli|o_Lactobacillales|f_Lactobacillaceae|g_Limosilactobacillus|s_	100%	100%	100%	95.2%	100%	100%
p_Firmicutes|c_Clostridia|o_Peptostreptococcales-Tissierellales|f_Peptostreptococcaceae|g_Peptostreptococcus|s_russellii	95.2%	100%	100%	100%	100%	100%
p_Firmicutes|c_Bacilli|o_Lactobacillales|f_Lactobacillaceae|g_Weissella|s_	100%	100%	100%	100%	95%	100%
p_Firmicutes|c_Bacilli|o_Lactobacillales|f_Lactobacillaceae|g_Limosilactobacillus|s_	100%	100%	100%	100%	95%	100%
p_Firmicutes|c_Bacilli|o_Lactobacillales|f_Lactobacillaceae|g_Ligilactobacillus|s_	100%	100%	100%	100%	95%	100%
p_Firmicutes|c_Bacilli|o_Lactobacillales|f_Streptococcaceae|g_Streptococcus|s_	100%	100%	100%	95.2%	90%	100%
p_Firmicutes|c_Bacilli|o_Lactobacillales|f_Streptococcaceae|g_Streptococcus|s_	100%	100%	95.2%	100%	85%	100%
p_Firmicutes|c_Bacilli|o_Lactobacillales|f_Lactobacillaceae|g_Lactobacillus|s_delbrueckii	100%	100%	95.2%	100%	90%	90.5%
p_Firmicutes|c_Bacilli|o_Lactobacillales|f_Lactobacillaceae|g_Limosilactobacillus|s_	100%	95.2%	90.5%	95.2%	90%	100%
p_Firmicutes|c_Bacilli|o_Lactobacillales|f_Lactobacillaceae|g_Limosilactobacillus|s_	100%	95.2%	95.2%	95.2%	80%	100%
p_Firmicutes|c_Bacilli|o_Lactobacillales|f_Streptococcaceae|g_Streptococcus|s_downei	100%	100%	95.2%	95.2%	75%	100%
p_Firmicutes|c_Clostridia|o_Lachnospirales|f_Lachnospiraceae|g_|s_	100%	95.2%	85.7%	90.5%	90%	100%
p_Firmicutes|c_Bacilli|o_Lactobacillales|f_Lactobacillaceae|g_Limosilactobacillus|s_	100%	95.2%	81%	100%	85%	100%
p_Actinobacteriota|c_Coriobacteriia|o_Coriobacteriales|f_Coriobacteriales Incertae Sedis|g_|s_	90.5%	95.2%	100%	95.2%	80%	100%
p_Proteobacteria|c_Gammaproteobacteria|o_Enterobacterales|f_Vibrionaceae|g_Photobacterium|s_phosphoreum	100%	100%	95.2%	100%	65%	100%
p_Firmicutes|c_Clostridia|o_Peptostreptococcales-Tissierellales|f_Family XI|g_Tepidimicrobium|s_	95.2%	95.2%	100%	95.2%	75%	95.2%
p_Actinobacteriota|c_Actinobacteria|o_Bifidobacteriales|f_Bifidobacteriaceae|g_Bifidobacterium|s_	100%	100%	95.2%	95.2%	70%	90.5%
p_Firmicutes|c_Clostridia|o_Peptostreptococcales-Tissierellales|f_Family XI|g_Gallicola|s_	90.5%	85.7%	95.2%	90.5%	90%	95.2%
p_Firmicutes|c_Bacilli|o_Lactobacillales|f_Lactobacillaceae|g_Pediococcus|s_	76.2%	100%	100%	100%	70%	85.7%
p_Proteobacteria|c_Gammaproteobacteria|o_Enterobacterales|f_Enterobacteriaceae|g_Escherichia-Shigella|s_	100%	95.2%	52.4%	90.5%	75%	85.7%
p_Fusobacteriota|c_Fusobacteriia|o_Fusobacteriales|f_Fusobacteriaceae|g_Psychrilyobacter|s_	90.5%	90.5%	81%	90.5%	45%	100%
p_Firmicutes|c_Bacilli|o_Lactobacillales|f_Lactobacillaceae|g_Ligilactobacillus|s_	100%	81%	90.5%	90.5%	40%	95.2%
p_Firmicutes|c_Bacilli|o_Lactobacillales|f_Lactobacillaceae|g_Lactobacillus|s_	100%	90.5%	71.4%	76.2%	70%	85.7%
p_Firmicutes|c_Bacilli|o_Lactobacillales|f_Lactobacillaceae|g_HT002|s_	100%	95.2%	47.6%	95.2%	50%	100%
p_Firmicutes|c_Bacilli|o_RsaHf231|f_|g_|s_	95.2%	85.7%	71.4%	81%	70%	81%
p_Firmicutes|c_Bacilli|o_Lactobacillales|f_Lactobacillaceae|g_Lactobacillus|s_	100%	81%	71.4%	85.7%	65%	81%
p_Actinobacteriota|c_Actinobacteria|o_Bifidobacteriales|f_Bifidobacteriaceae|g_Aeriscardovia|s_aeriphila	100%	76.2%	71.4%	85.7%	60%	90.5%
p_Firmicutes|c_Bacilli|o_Lactobacillales|f_Lactobacillaceae|g_Limosilactobacillus|s_	95.2%	85.7%	52.4%	90.5%	65%	90.5%
p_Firmicutes|c_Bacilli|o_Lactobacillales|f_Enterococcaceae|g_Enterococcus|s_	9.5%	95.2%	100%	95.2%	80%	95.2%
p_Firmicutes|c_Bacilli|o_Lactobacillales|f_Lactobacillaceae|g_Limosilactobacillus|s_	95.2%	76.2%	71.4%	81%	45%	90.5%
p_Firmicutes|c_Clostridia|o_Lachnospirales|f_Lachnospiraceae|g_Oribacterium|s_	95.2%	71.4%	71.4%	76.2%	50%	85.7%
p_Firmicutes|c_Bacilli|o_Lactobacillales|f_Lactobacillaceae|g_Leuconostoc|s_	76.2%	76.2%	66.7%	85.7%	65%	76.2%
p_Firmicutes|c_Clostridia|o_Clostridiales|f_Clostridiaceae|g_Hathewaya|s_	85.7%	81%	57.1%	85.7%	50%	81%
p_Proteobacteria|c_Alphaproteobacteria|o_Rhizobiales|f_Rhizobiaceae|g_|s_	0%	100%	85.7%	95.2%	70%	85.7%
p_Firmicutes|c_Clostridia|o_Peptostreptococcales-Tissierellales|f_Family XI|g_Anaerosalibacter|s_bizertensis	90.5%	71.4%	57.1%	90.5%	45%	81%
p_Firmicutes|c_Bacilli|o_Lactobacillales|f_Streptococcaceae|g_Streptococcus|s_	95.2%	66.7%	57.1%	71.4%	50%	90.5%
p_Firmicutes|c_Bacilli|o_Lactobacillales|f_Lactobacillaceae|g_HT002|s_	100%	76.2%	42.9%	71.4%	45%	90.5%
p_Firmicutes|c_Bacilli|o_Lactobacillales|f_Lactobacillaceae|g_Latilactobacillus|s_	85.7%	85.7%	42.9%	61.9%	55%	90.5%
p_Firmicutes|c_Bacilli|o_Lactobacillales|f_Lactobacillaceae|g_Limosilactobacillus|s_	100%	66.7%	52.4%	81%	45%	71.4%
p_Proteobacteria|c_Gammaproteobacteria|o_Enterobacterales|f_Enterobacteriaceae|g_Enterobacter|s_	71.4%	85.7%	66.7%	71.4%	50%	66.7%
p_Actinobacteriota|c_Actinobacteria|o_Bifidobacteriales|f_Bifidobacteriaceae|g_|s_	85.7%	66.7%	57.1%	66.7%	45%	85.7%
p_Firmicutes|c_Bacilli|o_Lactobacillales|f_Lactobacillaceae|g_Limosilactobacillus|s_	95.2%	66.7%	33.3%	66.7%	55%	85.7%
p_Firmicutes|c_Bacilli|o_Staphylococcales|f_Staphylococcaceae|g_Staphylococcus|s_	66.7%	81%	71.4%	76.2%	40%	66.7%
p_Actinobacteriota|c_Coriobacteriia|o_Coriobacteriales|f_|g_|s_	85.7%	61.9%	81%	66.7%	50%	52.4%
p_Proteobacteria|c_Gammaproteobacteria|o_Enterobacterales|f_Vibrionaceae|g_Photobacterium|s_	95.2%	61.9%	52.4%	66.7%	45%	76.2%
p_Firmicutes|c_Bacilli|o_Lactobacillales|f_Enterococcaceae|g_Enterococcus|s_cecorum	85.7%	81%	42.9%	81%	25%	76.2%
p_Firmicutes|c_Clostridia|o_Peptostreptococcales-Tissierellales|f_Family XI|g_Peptoniphilus|s_	95.2%	71.4%	23.8%	81%	50%	61.9%
p_Proteobacteria|c_Gammaproteobacteria|o_Pseudomonadales|f_Moraxellaceae|g_Acinetobacter|s_brisouii	100%	52.4%	42.9%	52.4%	65%	66.7%
p_Firmicutes|c_Bacilli|o_Bacillales|f_Bacillaceae|g_Bacillus|s_	28.6%	85.7%	33.3%	76.2%	65%	90.5%
p_Firmicutes|c_Clostridia|o_Peptostreptococcales-Tissierellales|f_Family XI|g_Peptoniphilus|s_	90.5%	66.7%	47.6%	61.9%	45%	61.9%
p_Firmicutes|c_Bacilli|o_Lactobacillales|f_Streptococcaceae|g_Lactococcus|s_raffinolactis	81%	66.7%	57.1%	42.9%	50%	71.4%
p_Fusobacteriota|c_Fusobacteriia|o_Fusobacteriales|f_Fusobacteriaceae|g_Cetobacterium|s_	85.7%	57.1%	66.7%	66.7%	30%	57.1%
p_Firmicutes|c_Bacilli|o_Lactobacillales|f_Enterococcaceae|g_Enterococcus|s_	4.8%	76.2%	52.4%	81%	55%	81%
p_Firmicutes|c_Bacilli|o_Lactobacillales|f_Lactobacillaceae|g_Lacticaseibacillus|s_	95.2%	52.4%	52.4%	61.9%	30%	57.1%
p_Firmicutes|c_Clostridia|o_Peptostreptococcales-Tissierellales|f_Family XI|g_Peptoniphilus|s_	85.7%	42.9%	47.6%	47.6%	45%	76.2%
p_Actinobacteriota|c_Coriobacteriia|o_Coriobacteriales|f_Atopobiaceae|g_Olsenella|s_	85.7%	66.7%	42.9%	42.9%	35%	66.7%
p_Firmicutes|c_Bacilli|o_Lactobacillales|f_Lactobacillaceae|g_Limosilactobacillus|s_	100%	47.6%	23.8%	61.9%	25%	71.4%
p_Bacteroidota|c_Bacteroidia|o_Bacteroidales|f_Bacteroidaceae|g_Bacteroides|s_	95.2%	52.4%	33.3%	61.9%	15%	71.4%
p_Firmicutes|c_Clostridia|o_Peptococcales|f_Peptococcaceae|g_Peptococcus|s_	85.7%	57.1%	42.9%	71.4%	10%	61.9%
p_Firmicutes|c_Bacilli|o_Lactobacillales|f_|g_|s_	95.2%	47.6%	33.3%	52.4%	55%	42.9%
p_Firmicutes|c_Bacilli|o_Lactobacillales|f_Lactobacillaceae|g_Limosilactobacillus|s_	100%	42.9%	23.8%	71.4%	25%	57.1%
p_Firmicutes|c_Clostridia|o_Peptostreptococcales-Tissierellales|f_Peptostreptococcaceae|g_Peptostreptococcus|s_	85.7%	52.4%	33.3%	52.4%	20%	76.2%
p_Firmicutes|c_Bacilli|o_Bacillales|f_Bacillaceae|g_|s_	9.5%	81%	76.2%	23.8%	100%	19%
p_Proteobacteria|c_Gammaproteobacteria|o_Pseudomonadales|f_Moraxellaceae|g_Acinetobacter|s_haemolyticus	76.2%	47.6%	19%	38.1%	35%	85.7%
p_Firmicutes|c_Clostridia|o_Peptostreptococcales-Tissierellales|f_Anaerovoracaceae|g_|s_	85.7%	33.3%	42.9%	47.6%	30%	61.9%
p_Firmicutes|c_Bacilli|o_Bacillales|f_Bacillaceae|g_Geobacillus|s_	81%	71.4%	9.5%	61.9%	20%	52.4%
p_Fusobacteriota|c_Fusobacteriia|o_Fusobacteriales|f_Fusobacteriaceae|g_Fusobacterium|s_	81%	42.9%	42.9%	47.6%	20%	57.1%
p_Firmicutes|c_Bacilli|o_Erysipelotrichales|f_Erysipelotrichaceae|g_|s_	85.7%	28.6%	52.4%	52.4%	20%	47.6%
p_Firmicutes|c_Negativicutes|o_Veillonellales-Selenomonadales|f_Veillonellaceae|g_Megasphaera|s_	85.7%	61.9%	28.6%	28.6%	25%	52.4%
p_Firmicutes|c_Bacilli|o_Lactobacillales|f_Lactobacillaceae|g_Limosilactobacillus|s_	95.2%	38.1%	19%	38.1%	25%	47.6%
p_Firmicutes|c_Bacilli|o_Lactobacillales|f_Vagococcaceae|g_Vagococcus|s_	81%	33.3%	28.6%	42.9%	10%	61.9%
p_Firmicutes|c_Bacilli|o_Lactobacillales|f_Lactobacillaceae|g_Lactobacillus|s_	85.7%	23.8%	19%	28.6%	30%	61.9%
p_Firmicutes|c_Clostridia|o_Clostridiales|f_Clostridiaceae|g_Clostridium sensu stricto 5|s_putrefaciens	81%	47.6%	19%	42.9%	20%	38.1%
p_Firmicutes|c_Clostridia|o_Oscillospirales|f_[Eubacterium] coprostanoligenes group|g_|s_	81%	23.8%	23.8%	47.6%	10%	52.4%
p_Fusobacteriota|c_Fusobacteriia|o_Fusobacteriales|f_Fusobacteriaceae|g_Fusobacterium|s_	85.7%	28.6%	23.8%	33.3%	30%	33.3%
p_Firmicutes|c_Bacilli|o_Lactobacillales|f_Lactobacillaceae|g_Lactobacillus|s_	90.5%	38.1%	19%	28.6%	20%	38.1%
p_Firmicutes|c_Bacilli|o_Lactobacillales|f_Vagococcaceae|g_Vagococcus|s_	81%	38.1%	9.5%	52.4%	15%	38.1%
p_Firmicutes|c_Bacilli|o_Lactobacillales|f_Lactobacillaceae|g_Lactobacillus|s_	90.5%	23.8%	23.8%	33.3%	25%	33.3%
p_Firmicutes|c_Bacilli|o_Lactobacillales|f_Lactobacillaceae|g_Dellaglioa|s_	81%	28.6%	14.3%	23.8%	5%	61.9%
p_Fusobacteriota|c_Fusobacteriia|o_Fusobacteriales|f_Fusobacteriaceae|g_Fusobacterium|s_	81%	33.3%	19%	28.6%	20%	28.6%
p_Firmicutes|c_Bacilli|o_Lactobacillales|f_Lactobacillaceae|g_Lactobacillus|s_kitasatonis	100%	14.3%	23.8%	23.8%	20%	28.6%
p_Proteobacteria|c_Gammaproteobacteria|o_Enterobacterales|f_Vibrionaceae|g_Photobacterium|s_	85.7%	28.6%	23.8%	19%	20%	23.8%
p_Firmicutes|c_Bacilli|o_Lactobacillales|f_Lactobacillaceae|g_Limosilactobacillus|s_	95.2%	28.6%	14.3%	14.3%	20%	23.8%
p_Proteobacteria|c_Gammaproteobacteria|o_Enterobacterales|f_Vibrionaceae|g_Photobacterium|s_	85.7%	28.6%	19%	14.3%	20%	23.8%
p_Firmicutes|c_Bacilli|o_Bacillales|f_Bacillaceae|g_Bacillus|s_coagulans	66.7%	4.8%	100%	9.5%	10%	0%
p_Firmicutes|c_Bacilli|o_Lactobacillales|f_Lactobacillaceae|g_Limosilactobacillus|s_	90.5%	23.8%	4.8%	14.3%	20%	33.3%
p_Firmicutes|c_Bacilli|o_Lactobacillales|f_Lactobacillaceae|g_Limosilactobacillus|s_	90.5%	14.3%	14.3%	19%	20%	19%
p_Firmicutes|c_Bacilli|o_Lactobacillales|f_Lactobacillaceae|g_Lactiplantibacillus|s_	85.7%	0%	19%	38.1%	10%	19%
p_Firmicutes|c_Bacilli|o_Lactobacillales|f_Lactobacillaceae|g_HT002|s_	90.5%	14.3%	14.3%	14.3%	20%	14.3%
p_Proteobacteria|c_Gammaproteobacteria|o_Enterobacterales|f_Vibrionaceae|g_Photobacterium|s_piscicola	85.7%	14.3%	19%	14.3%	20%	14.3%
p_Proteobacteria|c_Gammaproteobacteria|o_Pseudomonadales|f_Pseudomonadaceae|g_Pseudomonas|s_	81%	9.5%	14.3%	9.5%	20%	9.5%
p_Firmicutes|c_Bacilli|o_Bacillales|f_Bacillaceae|g_Bacillus|s_coagulans	0%	0%	100%	4.8%	0%	0%
p_Firmicutes|c_Bacilli|o_Bacillales|f_Bacillaceae|g_Bacillus|s_coagulans	0%	0%	81%	4.8%	0%	0%
